# Supplementary material for: Tunable structural and optical properties of CuInS2 colloidal quantum dots as photovoltaic absorbers
Source: Royal Society of Chemistry journal article supplement (doi:10.1039/d1ra03659a), 2021-01-01
Supplement: d1ra03659a1.pdf [file d1ra03659a1.pdf]

## Electronic Supplementary Information (ESI)

### Tunable Structural and Optical Properties of CuInS<sub>2</sub> Colloidal Quantum Dots as Photovoltaic Absorbers

Shanna-Kay Ming <sup>a</sup>, Richard A. Taylor\*<sup>a</sup>, Paul D. McNaughten <sup>b</sup>, David J. Lewis <sup>c</sup> Marina A. Leontiadou <sup>d,e</sup> and Paul O'Brien <sup>b,c</sup>,

<sup>a</sup>Department of Chemistry, University of the West Indies, St. Augustine, Trinidad and Tobago.

<sup>b</sup>Department of Chemistry, University of Manchester M13 BB, United Kingdom

<sup>c</sup>Department of Materials, University of Manchester, Manchester M13 9PL, United Kingdom.

<sup>d</sup>Department of Physics and Astronomy & Photon Science Institute, The University of Manchester, Manchester M13 9PL, United Kingdom.

<sup>e</sup>Present Address: Joule Physics Laboratory, School of Science, Engineering & Environment, University of Salford, Manchester M5 4WT, United Kingdom.

\*Corresponding author E-mail: [richard.taylor@sta.uwi.edu](mailto:richard.taylor@sta.uwi.edu)

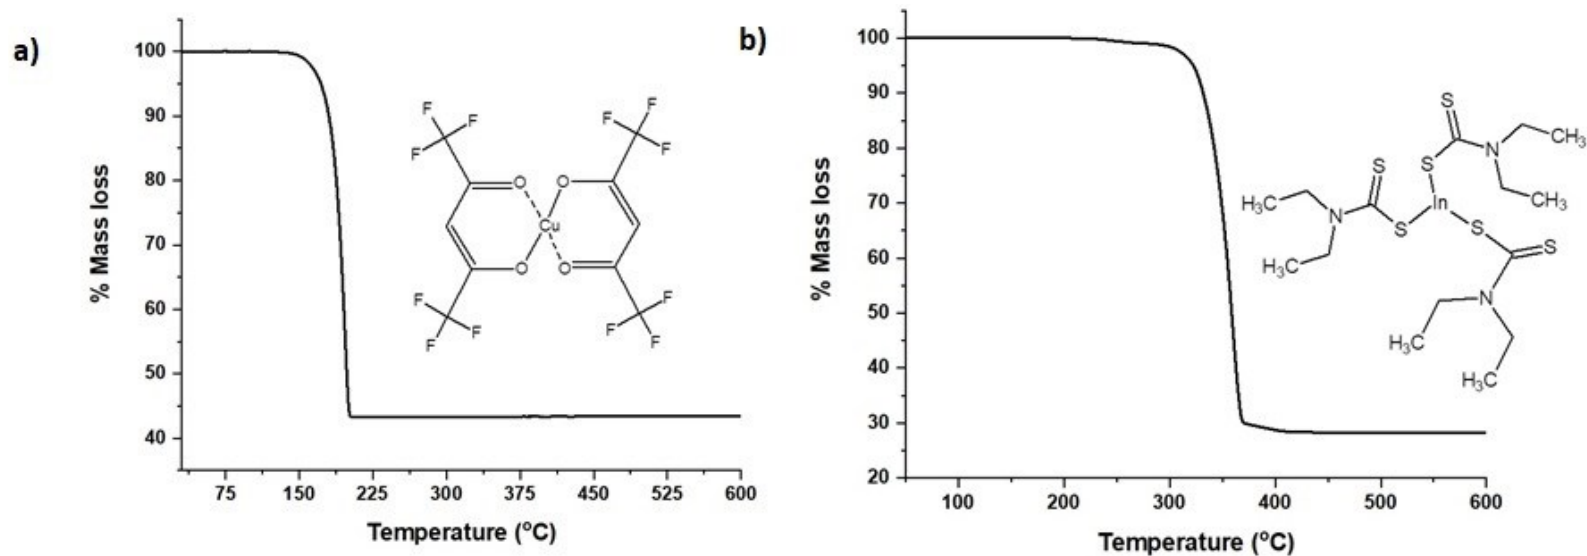

**Figure S1:** TGA thermograms for a) Cu(Hfacac)<sub>2</sub>.xH<sub>2</sub>O b) In(dedtc)<sub>3</sub> with respective molecular structures.

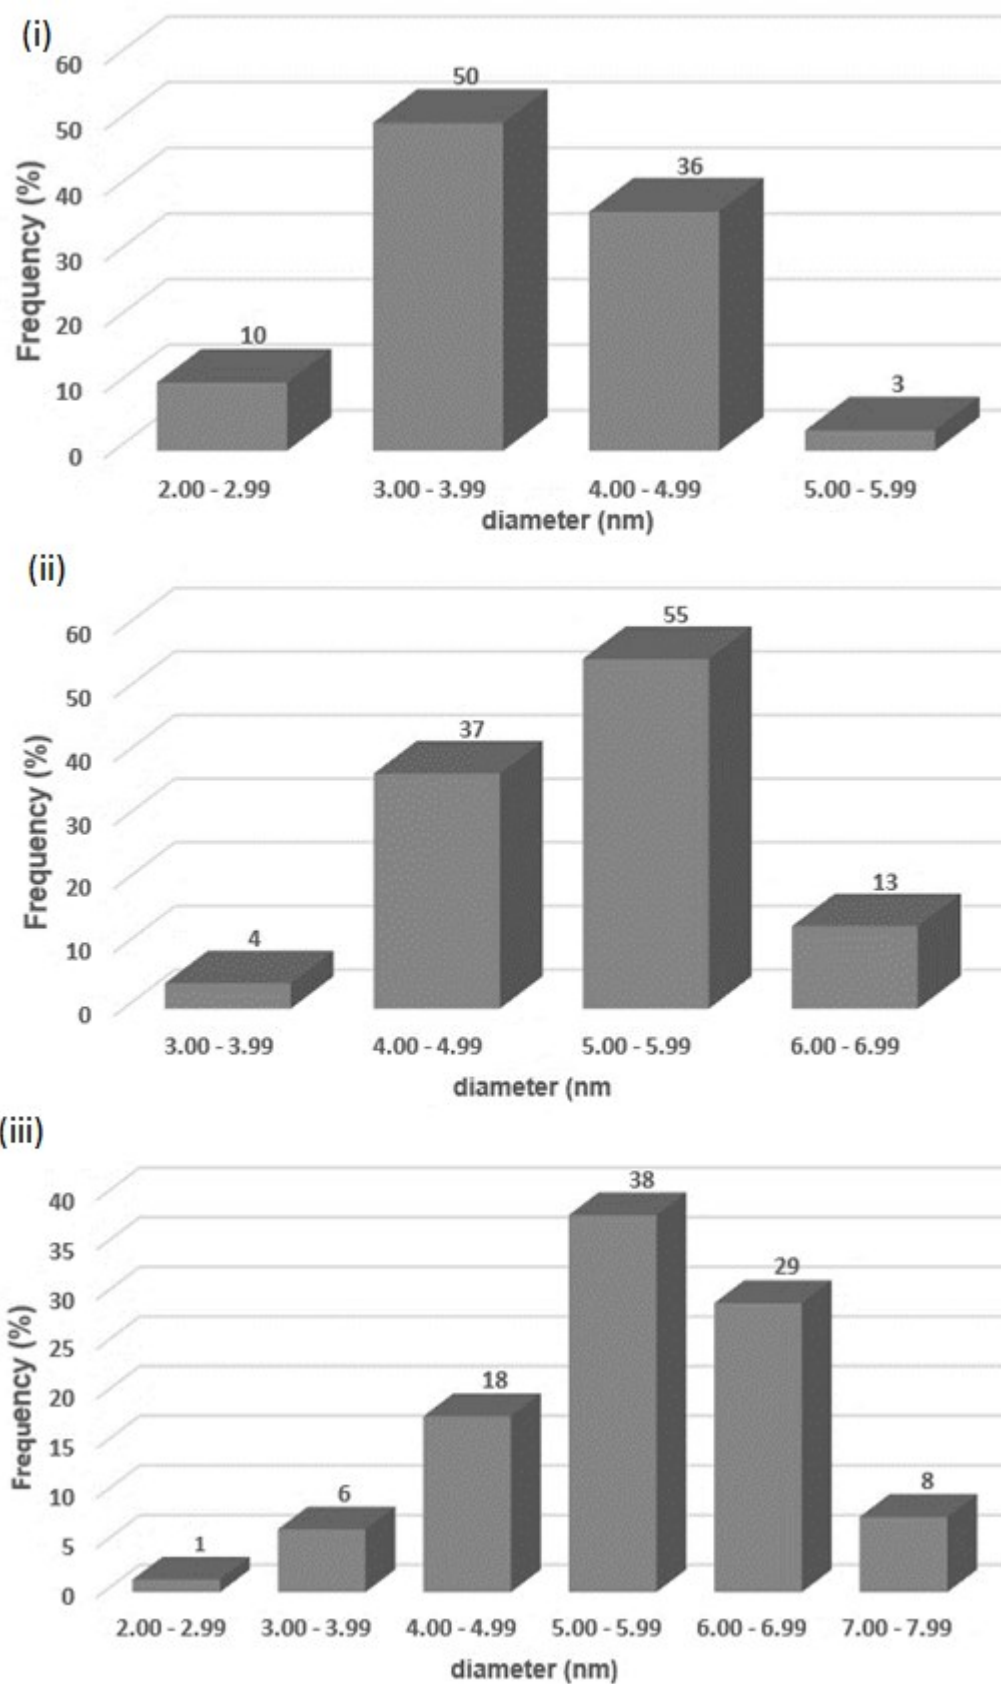

**Figure S2:** Histograms showing size distribution from TEM of CIS nanoparticles synthesized at (i) 140, (ii) 180 and (iii) 210 °C, respectively for 60 minutes.

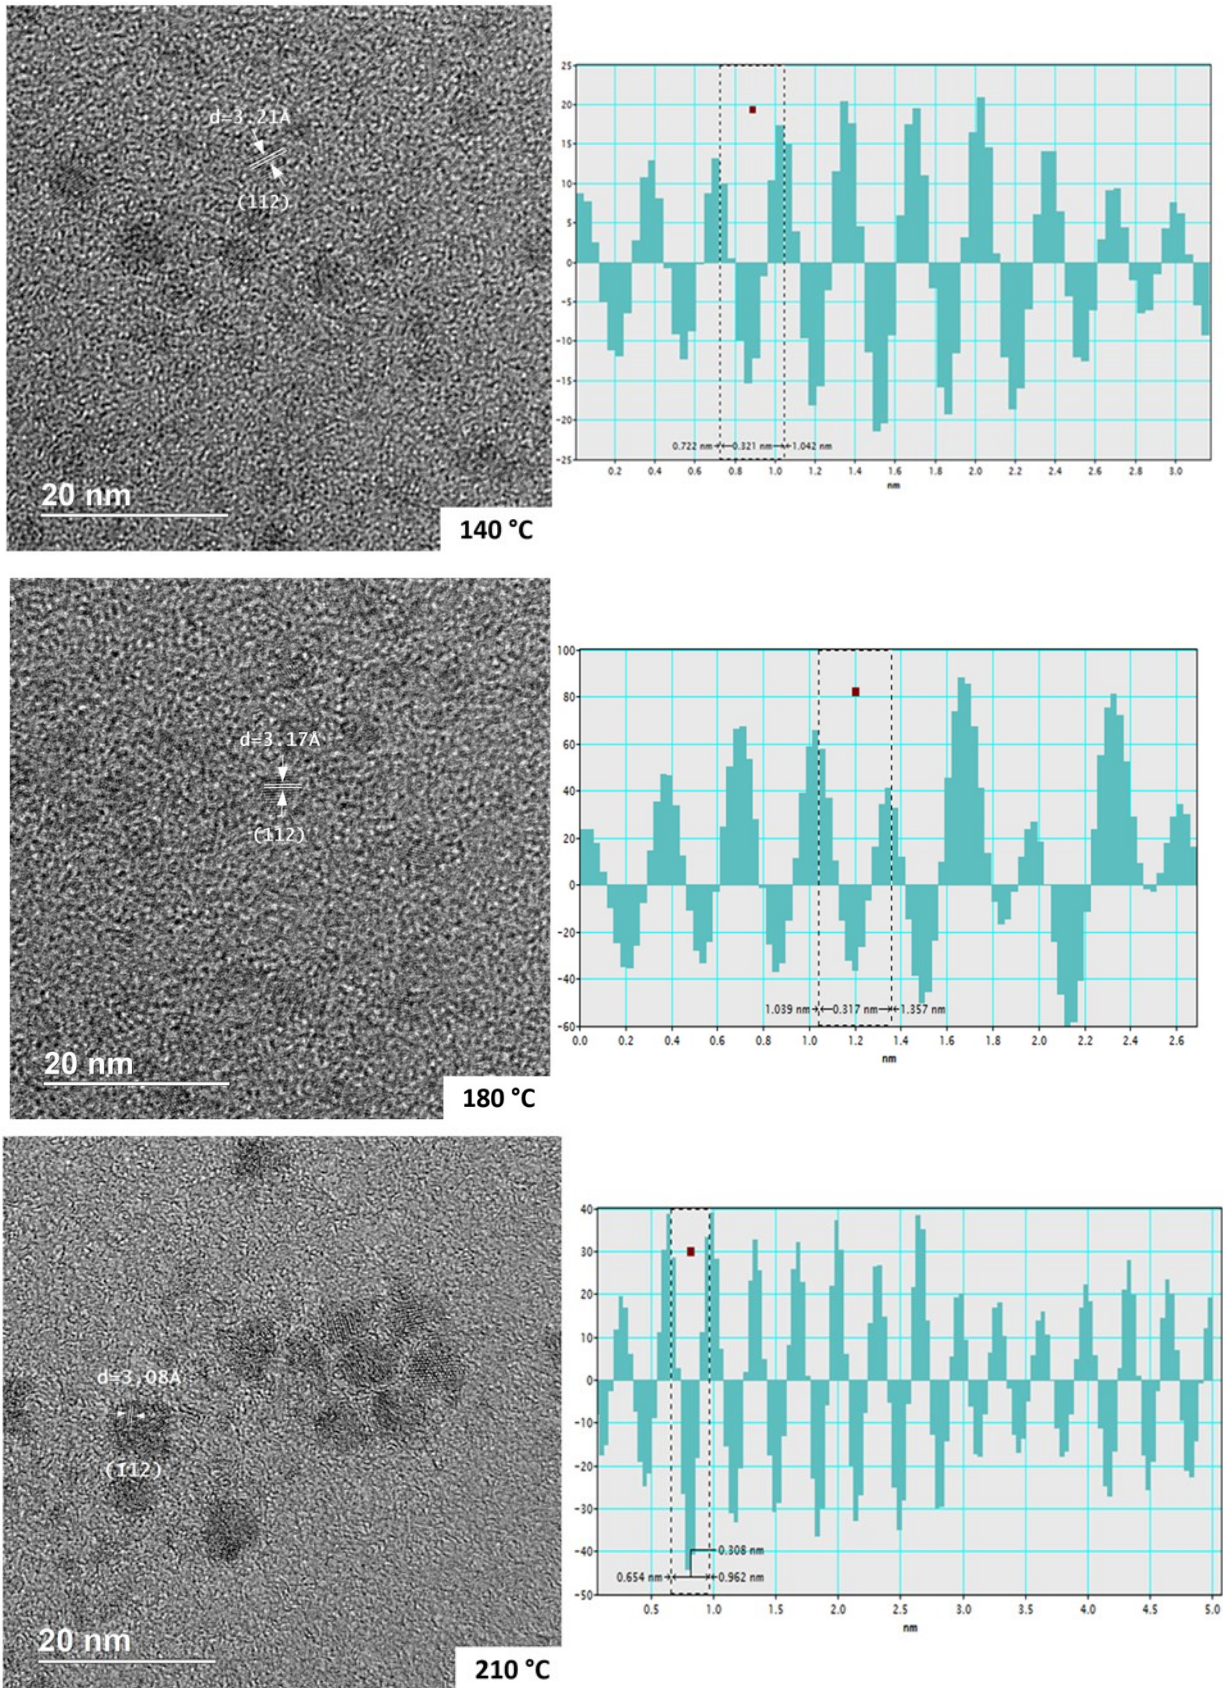

**Figure S3:** (Left) HR-TEM images of nanoparticle ensemble at different reaction temperatures with inset highlighting lattice spacings (right) corresponding lattice spacing measurements of 3.21, 3.17 and 3.08 Å.

**Table S1:** Lattice parameters, hkl values and corresponding d-spacings of synthesized chalcopyrite and wurtzite nanoparticles.

| Crystal Lattice: Tetragonal                          |           |         |
|------------------------------------------------------|-----------|---------|
| Space Group I-42d                                    |           |         |
| a = b = 5.5230, c = 11.14                            |           |         |
| $\alpha = \beta = \gamma = 90^\circ$                 |           |         |
| hkl                                                  | d-spacing | 2theta  |
| 112                                                  | 3.22541   | 27.634  |
| 204/220                                              | 1.94654   | 46.6228 |
| 116/312                                              | 1.65718   | 55.3979 |
| Crystal Lattice: Hexagonal                           |           |         |
| Space Group P63mc                                    |           |         |
| a = b = 3.9065, c = 6.4290                           |           |         |
| $\alpha = \beta = 90^\circ$ and $\gamma = 120^\circ$ |           |         |
| hkl                                                  | d-spacing | 2theta  |
| 100/002                                              | 3.32337   | 26.8041 |
| 101                                                  | 3.00959   | 29.6595 |
| 102                                                  | 2.31923   | 38.7969 |
| 110                                                  | 1.95491   | 46.4113 |
| 103                                                  | 1.81526   | 50.2186 |
| 112                                                  | 1.66885   | 54.9776 |
| 203                                                  | 1.33012   | 70.7776 |
| 211                                                  | 1.255     | 75.727  |

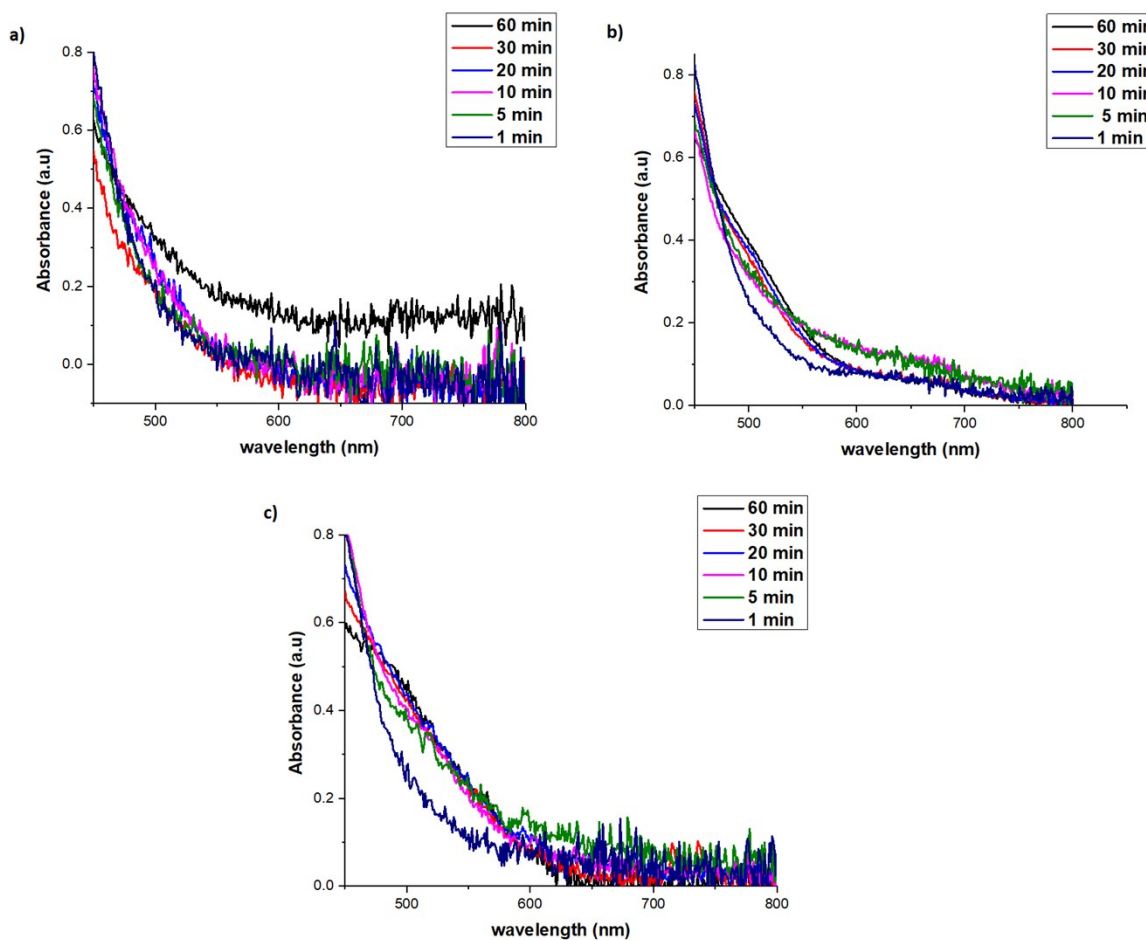

**Figure S4:** UV-vis absorption spectra of aliquots taken at specific intervals from reactions at temperatures a) 140 b) 180 c) 210 °C, respectively.

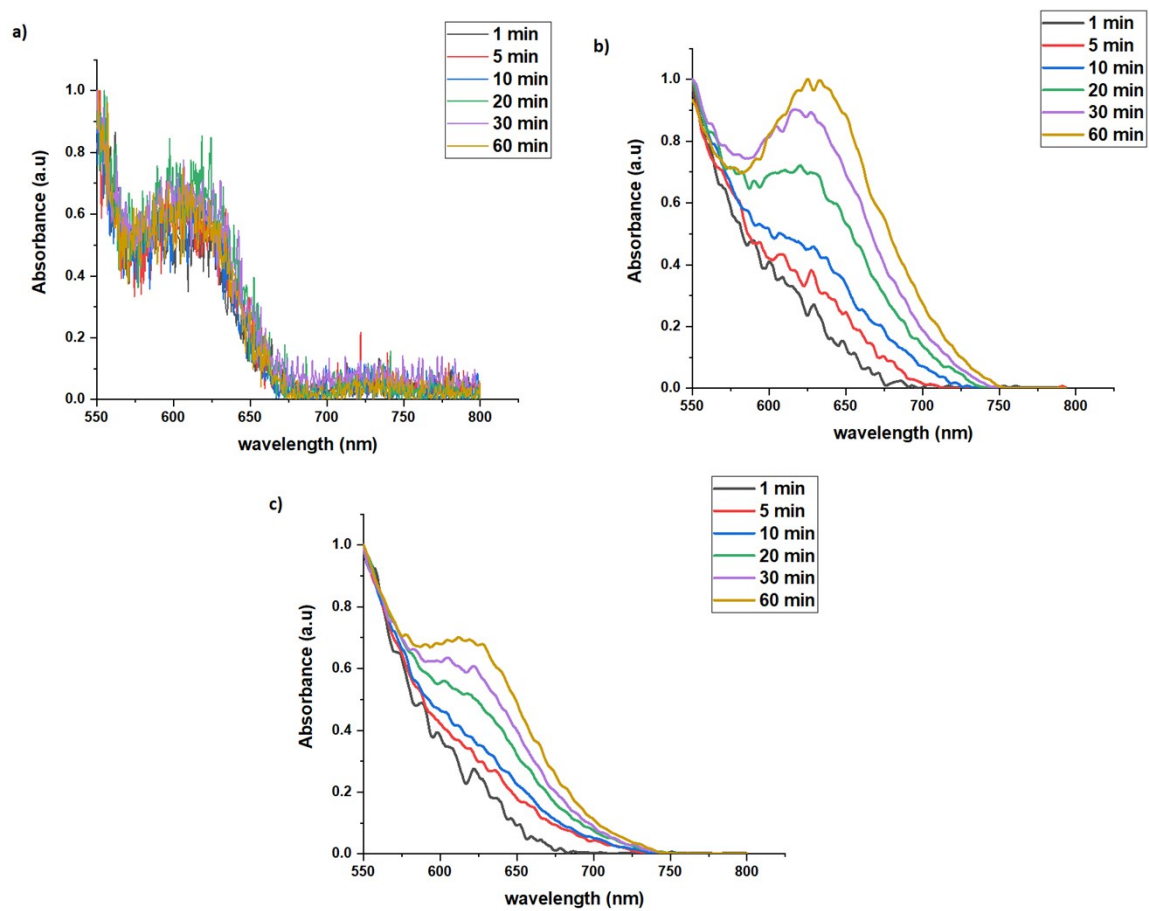

**Figure S5:** Photoluminescence spectra of aliquots taken at specific intervals from reactions at temperatures a) 140 b) 180 c) 210 °C ( $\lambda_{\text{exc}} = 440$  nm).
